# Supplementary material for: Pre-eruptive excess volatiles and their relationship to effusive and explosive eruption styles in semi-plugged volcanoes
Source: Frontiers journal article supplement (doi:10.3389/feart.2022.882097), 2022-09-09
Supplement: Table_7.XLSX [file Table_7.XLSX]

## Sheet: Sheet1
Table S7: Experimental Fe-Ti oxide compositions in wt. %
T (°C)	1000	1000	1000	1000	1000	1000	1000
Charge	SUPL1-1	SUPL1-2	SUPL1-3	SUPL1-10	SUPL1-11	SUPL1-12	SUPL1-13
n:	1	1	3	3	7	8	3
wt .%
SiO2	0.480477	0.279931	0.30 (0.07)	0.30 (0.08)	0.21 (0.03)	0.30 (0.13)	0.26 (0.10)
TiO2	5.24428	11.4511	10.95 (0.47)	8.1 (0.10)	8.99 (0.26)	13.20 (0.15)	16.87 (0.07)
Al2O3	5.70342	3.28281	3.49 (0.10)	5.3 (0.10)	4.83 (0.13)	3.76 (0.10)	3.07 (0.10)
FeO*	67.026	71.8498	70.8 (0.7)	71.4 (0.2)	70.5 (0.7)	70.0 (0.2)	63.9 (0.2)
MnO	0.465005	0.431402	0.47 (0.02)	0.42 (0.01)	0.46 (0.01)	0.46 (0.01)	0.51 (0.01)
MgO	3.66461	2.39194	2.37 (0.04)	3.05 (0.02)	2.76 (0.05)	2.43 (0.03)	2.11 (0.08)
CaO	0.203394	0.282555	0.24 (0.03)	0.17 (0.03)	0.15 (0.01)	0.20 (0.04)	0.25 (0.02)
Na2O	0.029625	0.007553	b.d.	b.d.	b.d.	b.d.	b.d.
K2O	b.d.	0.013585	b.d.	0.02 (0.01)	0.01 (0.01)	0.01 (0.01)	0.01 (0.01)
Total	82.8168	89.9907	88.6 (0.8)	88.8 (0.3)	88.0 (0.8)	90.4 (0.2)	86.93 (0.02)
FeOc	54.0052	59.1526	58.4 (0.5)	57.7 (0.1)	57.5 (0.5)	58.3 (0.1)	55.3 (0.1)
Fe2O3	14.47	14.1104	13.77 (0.24)	15.22 (0.09)	14.49 (0.20)	13.03 (0.08)	9.54 (0.07)
Xusp	0.24101	0.376175	0.37(0.01)	0.28 (0.01)	0.31 (0.01)	0.44 (0.01)	0.58 (0.01)
T (°C)	950	950	950	950	950	950	950	950
Charge	SUPL1-26	SUPL1-27	SUPL1-28	SUPL1-29	SUPL1-30	SUPL1-62	SUPL1-63	SUPL1-65
n:	1	1	1	1	1	1	1	2
wt .%
SiO2	0.276897	0.383413	0.626497	0.425221	0.349769	0.298757	0.338235	0.19 (0.01)
TiO2	15.8273	16.1831	16.729	15.0513	15.9767	16.2751	7.53168	11.97 (0.19)
Al2O3	2.85674	2.61502	2.72017	2.70525	4.49189	2.57542	3.80375	3.00 (0.05)
FeO*	70.8616	68.6108	64.794	69.9372	63.943	67.03	75.9325	72.5 (0.9)
MnO	0.308647	0.443395	0.445854	0.453549	0.470156	0.446163	0.50481	0.41 (0.02)
MgO	0.729674	1.42845	1.42018	1.74764	2.24307	1.40184	1.84224	1.52 (0.01)
CaO	0.319357	0.223225	0.27349	0.3537	0.268066	0.313333	0.276356	0.30 (0.03)
Na2O	0.029191	b.d.	0.002011	0.039952	0.003679	-0.00144	0.034378	b.d.
K2O	b.d.	0.020748	0.0211	0.019981	0.027188	0.011313	0.017095	b.d.
Total	91.1971	89.9029	87.0323	90.7338	87.7735	88.3505	90.281	89.9 (1.0)
FeOc	57.6949	58.7807	56.409	59.0691	55.0266	60.5414	61.3672	60.2 (0.6)
Fe2O3	10.374	10.9242	9.31826	12.0778	9.90881	11.4688	16.1865	13.66 (0.26)
Xusp	0.501922	0.525119	0.565443	0.48659	0.55055	0.537791	0.245754	0.39 (0.01)
FeO* = total Fe expressed as Fe2+
Fe2O3 calculated using the approach by Droop (1987), where Fe2O3 = FeO* x (Fe3+ / Fe2+ + Fe3+) x 1.1113
FeOc = FeO calculated using the approach by Droop (1987) ,where FeOc = FeO* x (Fe2+ / Fe2+ + Fe3+)
Xusp = 3 x Ti / (Ti + Fe), calculated according to Sauerzapf et al. (2008)
Numbers in parentheses refer to 1s of the mean of multiple analyses. Where the 1s is less than the relative error, the relative error is reported instead.
b.d. = below detection level
